# Supplementary material for: Catalytic homogeneous hydrogenation of compounds containing X ? O semipolar bonds (X = N, S, P) with para-hydrogen as a promising route for preparation of para-water
Source: Royal Society of Chemistry journal article supplement (doi:10.1039/b610125a), 2006-01-01
Supplement: b610125a.pdf [file b610125a.pdf]

## Catalytic homogeneous hydrogenation of compounds containing X→O semipolar bonds (X = N, S, P) with *para*-hydrogen as a promising route for preparation of *para*-water<sup>†</sup>

Yuri A. Ustynyuk,\*Alexei V. Gavrikov, and Nikolay M. Sergeev

### Electronic Supplementary Information (ESI)

#### Calculations details.

Stationary points were identified by an analysis of Hessians. The energies of the stationary points are corrected to zero-point vibrations (ZPVE). The statistical formulas of rigid rotator and harmonic oscillator were used for the calculation of the thermodynamic functions. Construction of internal reaction coordinate (IRC) was used to check the observed transition states.

Table 1. Calculated thermodynamic functions of the reactants, intermediates, and reaction products (all Hessian eigenvalues are positive, and the stationary points are minima on the PES)

|                                                            | E, a.u.** | E <sub>0</sub> , a.u | S <sup>0</sup> <sub>298</sub> ,<br>cal*mol <sup>-1</sup> *K <sup>-1</sup> | U <sup>0</sup> <sub>298</sub> -E,<br>kcal*mol <sup>-1</sup> | H <sup>0</sup> <sub>298</sub> -E,<br>kcal*mol <sup>-1</sup> | G <sup>0</sup> <sub>298</sub> -E,<br>kcal*mol <sup>-1</sup> |
|------------------------------------------------------------|-----------|----------------------|---------------------------------------------------------------------------|-------------------------------------------------------------|-------------------------------------------------------------|-------------------------------------------------------------|
| CIRh(PPh <sub>3</sub> ) <sub>3</sub>                       | -478.116  | -477.312             | 323.5                                                                     | 539.1                                                       | 539.7                                                       | 443.3                                                       |
| CIRh(PPh <sub>3</sub> ) <sub>2</sub> (1)                   | -360.433  | -359.899             | 243.7                                                                     | 359.5                                                       | 360.1                                                       | 287.4                                                       |
| CIRh(PPh <sub>3</sub> ) <sub>2</sub> (1T)*                 | -360.408  | -359.873             | 255.0                                                                     | 360.0                                                       | 360.6                                                       | 284.6                                                       |
| CIRh(PPh <sub>3</sub> ) <sub>2</sub> H <sub>2</sub> (2)    | -361.645  | -361.094             | 255.1                                                                     | 370.5                                                       | 371.0                                                       | 295.0                                                       |
| CIRh(PPh <sub>3</sub> ) <sub>2</sub> H <sub>2</sub> (2T)   | -361.586  | -361.038             | 252.0                                                                     | 369.0                                                       | 369.6                                                       | 294.4                                                       |
| CIRh(PPh <sub>3</sub> ) <sub>2</sub> (OH)H(4)              | -377.661  | -377.104             | 256.1                                                                     | 375.0                                                       | 375.6                                                       | 299.2                                                       |
| CIRh(PPh <sub>3</sub> ) <sub>2</sub> (OH)H(4T)             | -377.624  | -377.068             | 257.1                                                                     | 374.2                                                       | 374.8                                                       | 298.2                                                       |
| CIRh(PPh <sub>3</sub> ) <sub>2</sub> (OH <sub>2</sub> )(6) | -377.667  | -377.106             | 252.1                                                                     | 377.4                                                       | 377.9                                                       | 302.8                                                       |
|                                                            |           |                      |                                                                           |                                                             |                                                             |                                                             |
| H <sub>2</sub>                                             | -1.166    | -1.157               | 32.6                                                                      | 7.6                                                         | 8.2                                                         | -1.5                                                        |
| H <sub>2</sub> O                                           | -17.213   | -17.192              | 46.5                                                                      | 14.9                                                        | 15.5                                                        | 1.6                                                         |
|                                                            |           |                      |                                                                           |                                                             |                                                             |                                                             |
| C <sub>5</sub> H <sub>5</sub> NO                           | -57.255   | -57.165              | 73.8                                                                      | 59.9                                                        | 60.5                                                        | 38.5                                                        |
| C <sub>5</sub> H <sub>5</sub> N                            | -41.285   | -41.199              | 69.2                                                                      | 56.8                                                        | 57.4                                                        | 36.8                                                        |
| C <sub>5</sub> H <sub>5</sub> N*H <sub>2</sub> O           | -58.511   | -58.401              | 89.3                                                                      | 74.0                                                        | 74.6                                                        | 48.0                                                        |
|                                                            |           |                      |                                                                           |                                                             |                                                             |                                                             |
| Ph <sub>3</sub> PO                                         | -133.693  | -133.423             | 140.8                                                                     | 180.5                                                       | 181.1                                                       | 139.1                                                       |
| Ph <sub>3</sub> P                                          | -117.644  | -117.378             | 135.5                                                                     | 177.0                                                       | 177.6                                                       | 137.2                                                       |
|                                                            |           |                      |                                                                           |                                                             |                                                             |                                                             |
| (CH <sub>3</sub> ) <sub>2</sub> SO                         | -41.077   | -41.000              | 74.9                                                                      | 51.7                                                        | 52.2                                                        | 29.9                                                        |
| (CH <sub>3</sub> ) <sub>2</sub> S                          | -25.090   | -25.017              | 69.4                                                                      | 49.2                                                        | 49.8                                                        | 29.1                                                        |
|                                                            |           |                      |                                                                           |                                                             |                                                             |                                                             |
| N <sub>2</sub> O                                           | -35.835   | -35.825              | 52.6                                                                      | 8.5                                                         | 9.0                                                         | -6.6                                                        |
| N <sub>2</sub>                                             | -19.888   | -19.883              | 47.2                                                                      | 4.8                                                         | 5.4                                                         | -8.6                                                        |

\*The index (T) is used to designate the triplet state.

\*\*a.u. = 627.52 kcal/mol
